# Supplementary material for: Studies into the Yb-doping effects on photoelectrochemical properties of WO3 photocatalysts
Source: Royal Society of Chemistry journal article supplement (doi:10.1039/c5ra26254b), 2016-01-01
Supplement: c5ra26254b1.pdf [file c5ra26254b1.pdf]

## Electronic Supplementary Information

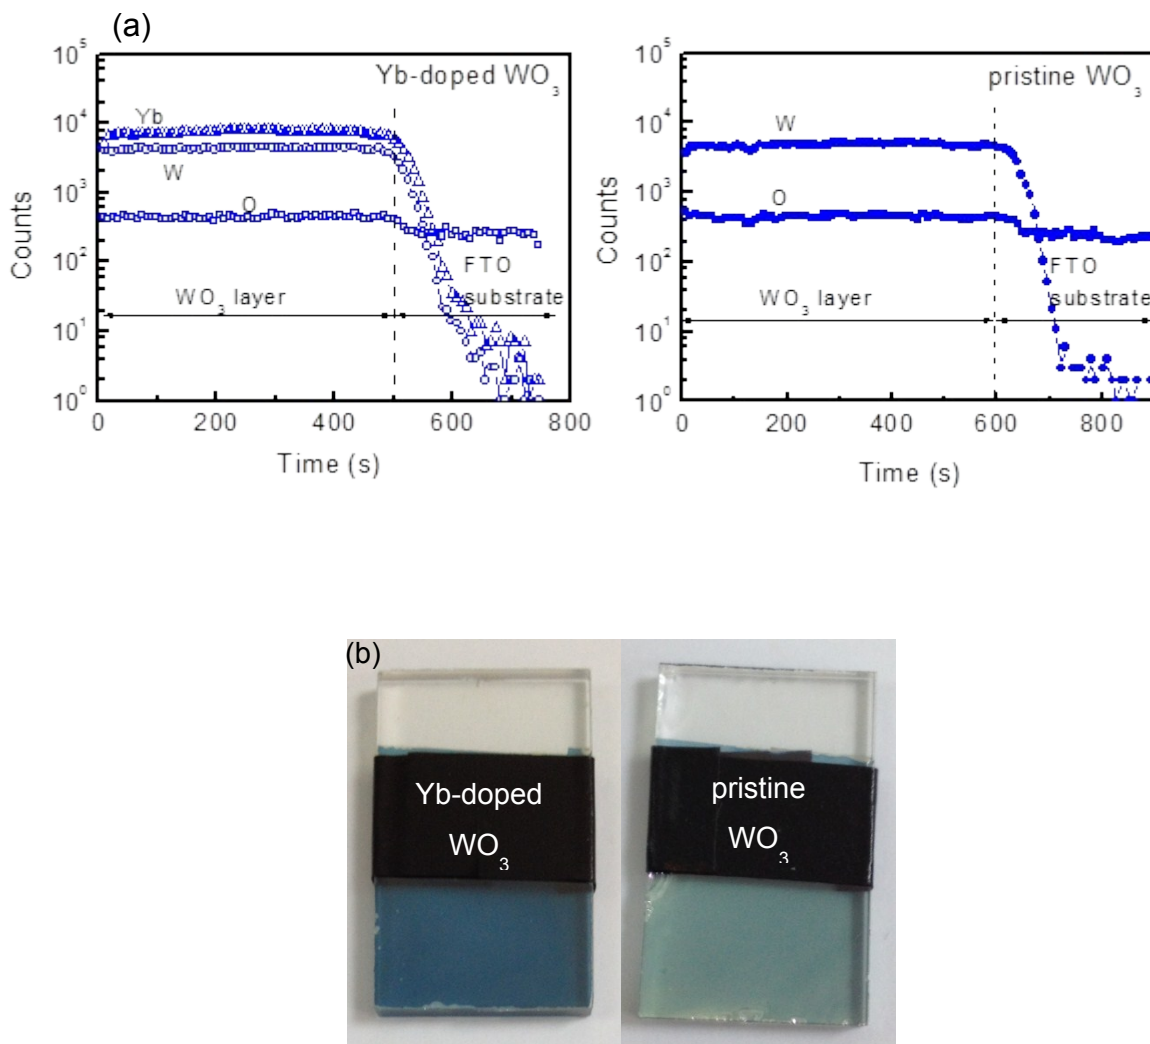

Fig. S1(a) SIMS elemental depth profiles of Yb-doped and pristine  $\text{WO}_3$  sintered at  $550^\circ\text{C}$ .

(b) Colour change of photocatalysts from pale green in pristine  $\text{WO}_3$  to deep blue in Yb-doped  $\text{WO}_3$  sintered at  $550^\circ\text{C}$ .

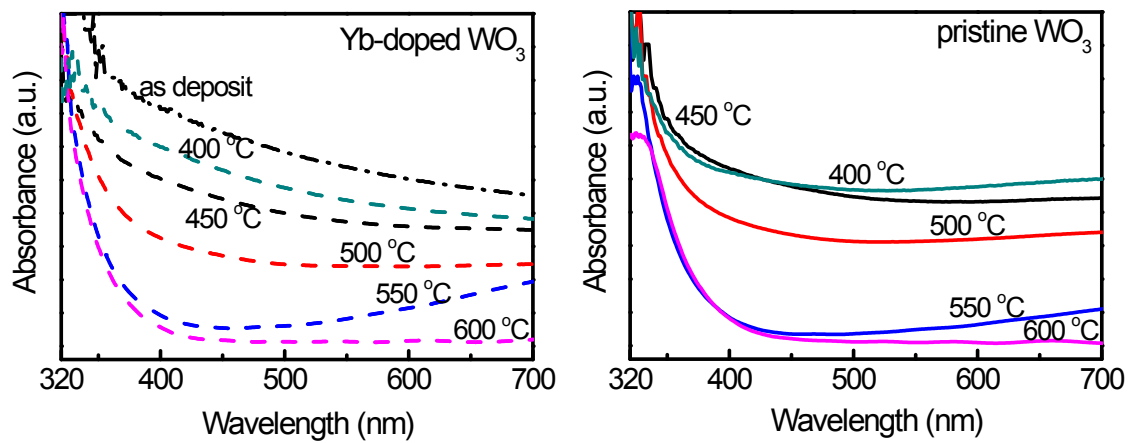

Fig. S2 Optical absorption spectra of Yb-doped and pristine WO<sub>3</sub> sintered from 400 to 600 °C.

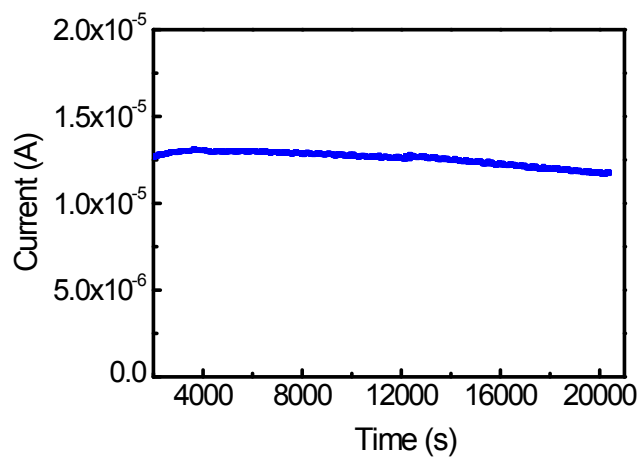

Fig. S3 Time stability of photocurrent of Yb-doped WO<sub>3</sub>.
